# Supplementary material
Source: Royal Society of Chemistry journal article supplement (doi:10.1039/d6tb00802j)
Supplement: d6tb00802j1.pdf [file d6tb00802j1.pdf]

**Photodynamically Active AIE-Functionalised Casein Nanofibers for Antibacterial Wound Management in *Epidermolysis Bullosa***

Nikolay Estiven Gomez Mesa <sup>1,2</sup>, Resmarani Sahu <sup>1,2</sup>, Quan Trong Luu <sup>2</sup>, Krasimir Vasilev <sup>2</sup>, Youhong Tang <sup>1,3,\*</sup>

<sup>1</sup> Medical Device Research Institute, Institute for NanoScale Science and Technology, College of Science and Engineering, Flinders University, South Australia 5042, Australia

<sup>2</sup> Biomedical Nanoengineering Laboratory, College of Medicine and Public Health, Flinders University, South Australia 5042 Australia

<sup>3</sup> School of Automation and Intelligent Manufacturing, Southern University of Science and Technology, Guangdong 518055, China

\* Corresponding author. Email: [youhong.tang@flinders.edu.au](mailto:youhong.tang@flinders.edu.au) (Y Tang)

## Supporting information

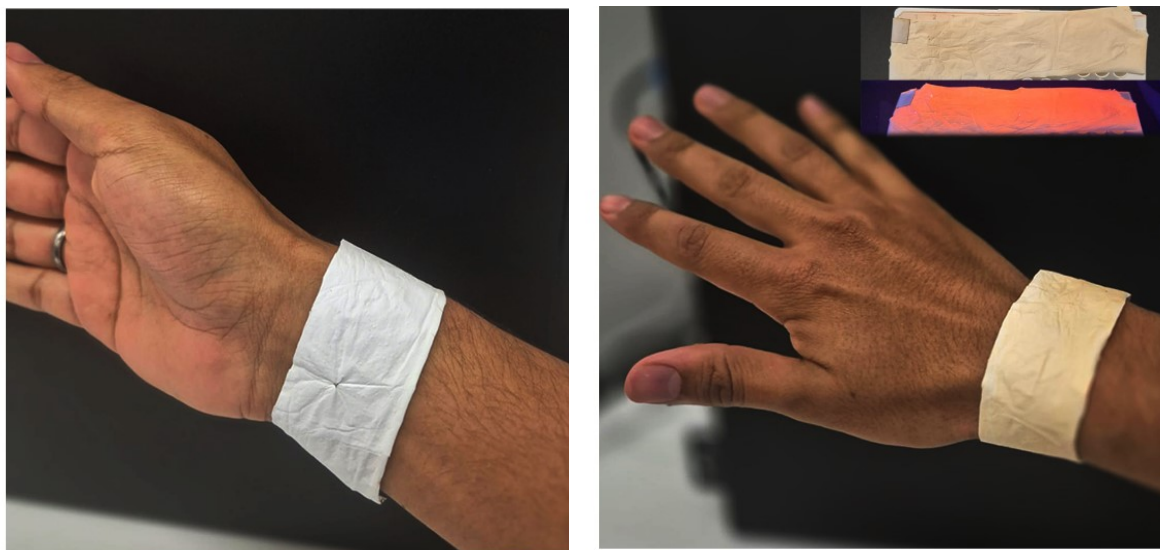

Figure S1. Visual appearance of electrospun dressings before and after AIE coating. (A) Uncoated dressing (SC40). (B) TPAQ-PF<sub>6</sub> plasma-coated dressing (SC40-GA-P-A) exhibiting a yellow–orange coloration under ambient light, and showing orange fluorescence under 365 UV light confirming immobilization
